# Supplementary material for: Contractile force assessment methods for in vitro skeletal muscle tissues
Source: eLife. 2022 May 23;11:e77204. doi: 10.7554/eLife.77204 (PMC9126583; doi:10.7554/eLife.77204)
Supplement: Figure 6—source data 1. [file elife-77204-fig6-data1.xlsx]

## Sheet: Figure6
	CANTILEVER DEFLECTION	POST DEFLECTION	FORCE TRANSDUCERS
SIZE
ORGANIZATIONAL LEVEL	Single Myotubes or Myotube sheets (2D)	Myobundle (3D)	Myobundle (3D)
CULTURE TIME (Weeks)
FORCE RECORDED RANGE
ACUTE STIMULATION	Electrical Optical Biochemical	Electrical Optical Biochemical	Electrical
CHRONIC STIMULATION	__	Electrical Optical	Electrical Optical
CONTRACTION FORCE*	Twitch (100%) Tetanic (27%)	Twitch (44%) Tetanic (90%)	Twitch (94%) Tetanic (90%)
TWITCH KINETICS*	0.27	0.11	0.44
PASSIVE FORCE*	0.18	0.22	0.28
SARCOMERE EVALUATION	% of cross-striated myotubes Lenght and periodicity Viasualization with Transmision Electron Microscopy	% sarcomere formation and coverage	% of cross-striated myotubes Viasualization with Transmision Electron Microscopy
CALCIUM HANDLING*	0.09	0.22	0.22
FUNCTIONAL MEASUREMNTS	Force-frequency relationship Fatigue	Force-frequency relationship	Force-frequency relationship Fatigue Force-lenght relationship Rheobase and Chronaxie
MUSCLE CHARACTERIZATION	Fluorescent inmunostaining for α-actinin	Fluorescent inmunostaining for α-actinin	Fluorescent inmunostaining for α-actinin
MOLECULAR EVALUATION	qPCR for MYH Isoforms RNAseq for genes responsible of CF Western blot for M-cadherin Mitochrondrial membrane Potential	qPCR and western blot for MYH Isoforms RT-PCR for expression of atrogenes Proteomics Creatinine Kinase activity Sarcolemma Integrity	Western blot for MYH Isoforms, myogenin and tropomyosin Glucose and lactate Creatinine Kinase activity Phosphorylation of mTOR-related kinases
CF MEASUREMENT	Non-invasive	Non-invasive	Invasive
HIGH-RESOLUTION MICROSCOPY	Compatible	Inverted setup compatible	Non compatible
END-POINT MEASUREMENTS	No	No	Yes
HIGH-THROUGHPUT POTENTIAL	Yes	Yes	No
*Represents the % of studies that have performed this measurement
